# Supplementary material
Source: PubMed Central journal article supplement (PMC7746607)

Figure 3 C  
IP

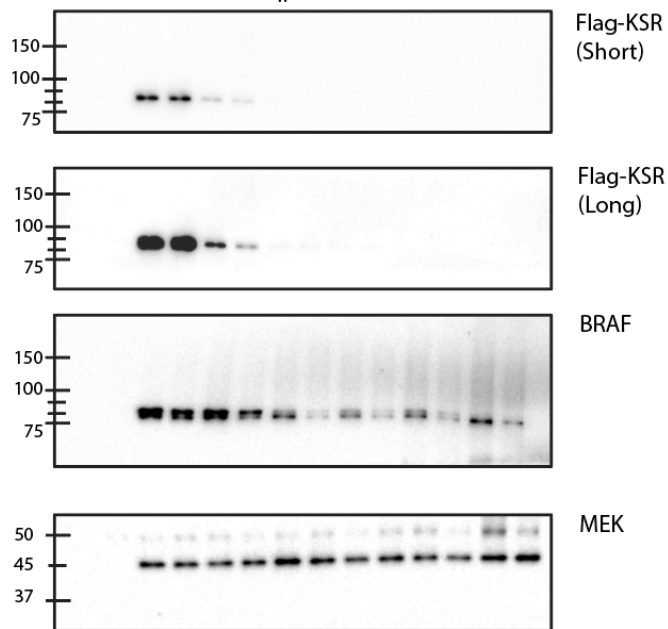

Input

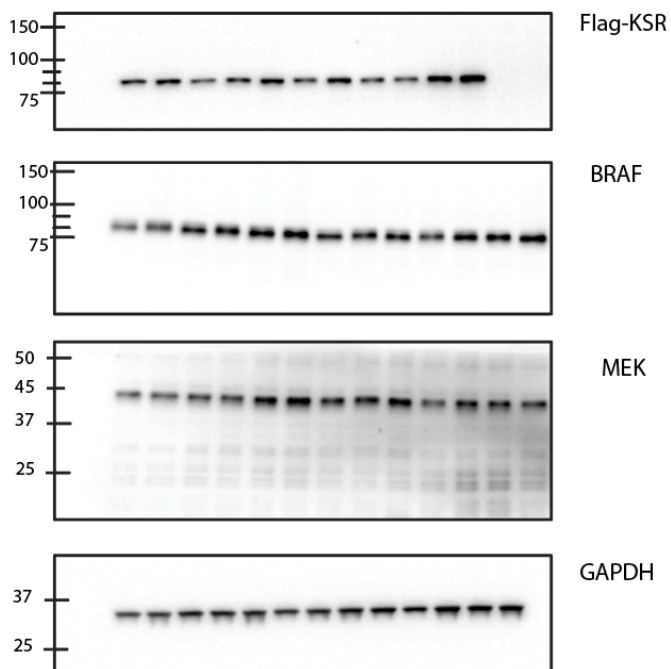

Figure 3 D  
IP

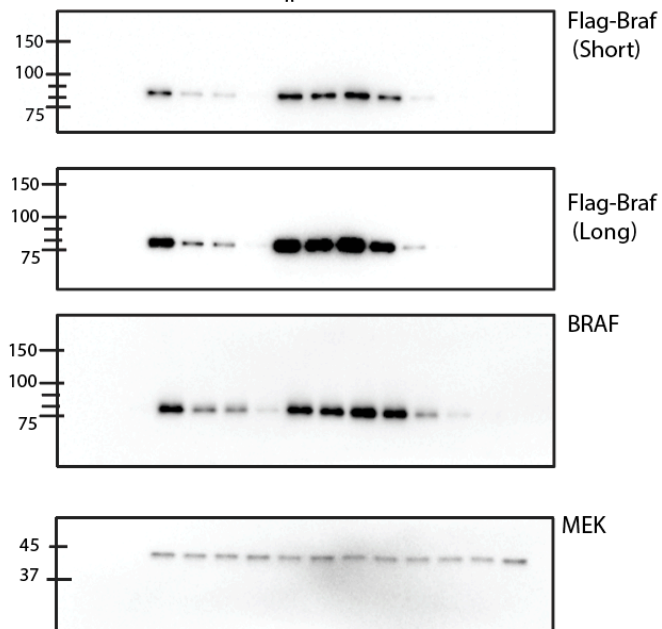

Input

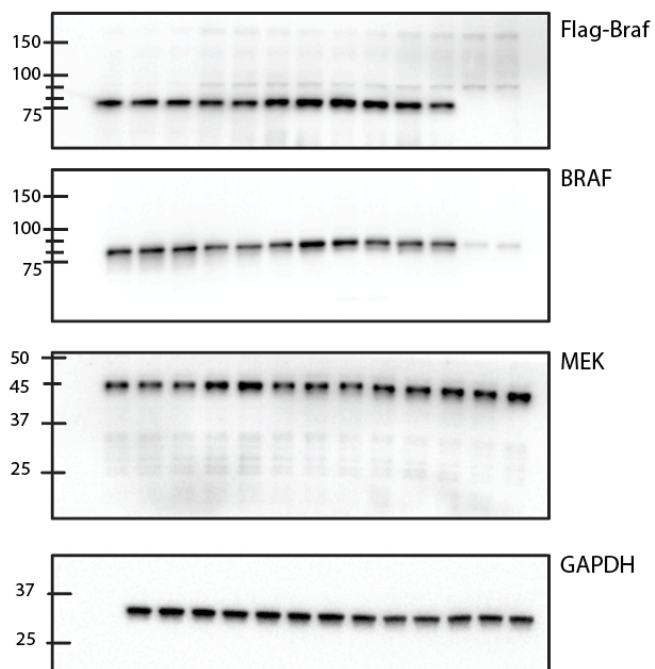

Figure 4E

IP Blots

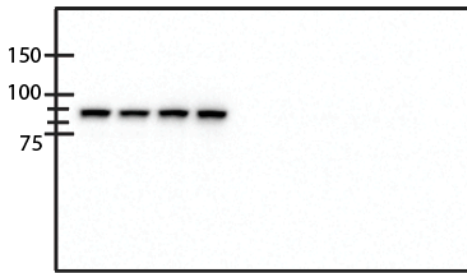

Flag-KSR

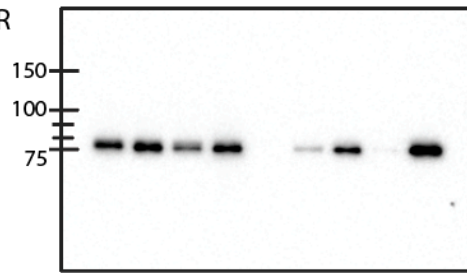

BRAF

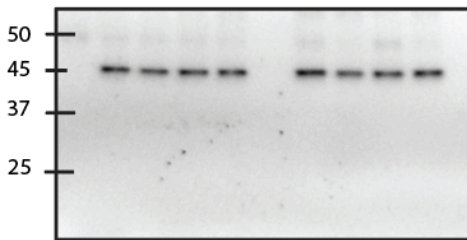

MEK

Input Blots

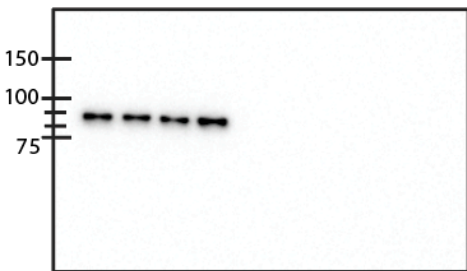

Flag-KSR

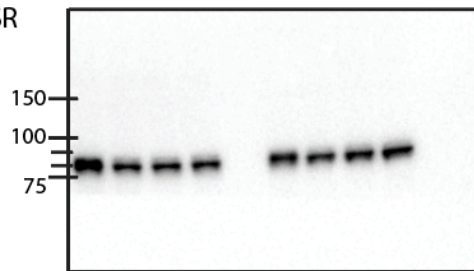

BRAF

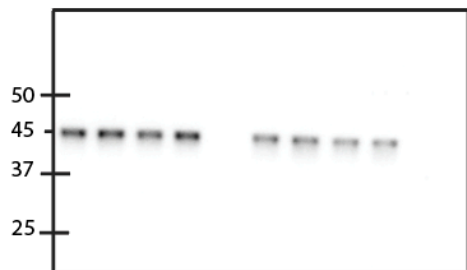

MEK

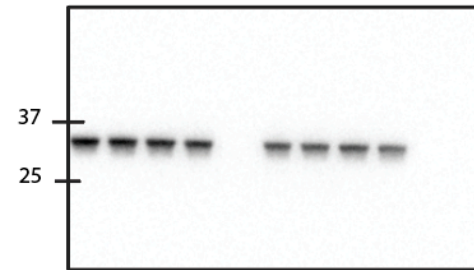

GAPDH

Extended Data Figure 7C

Flag-KSR Expression IP

Flag-BRAF Expression IP

Untransfected IP

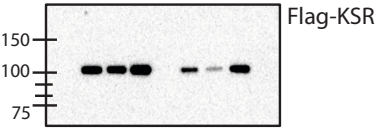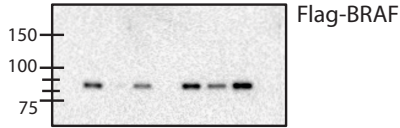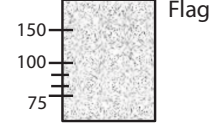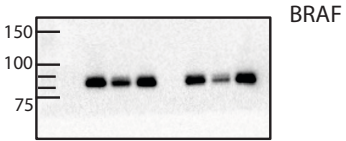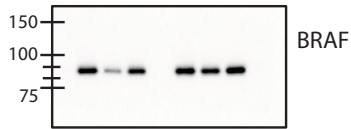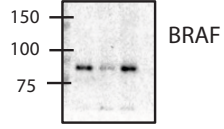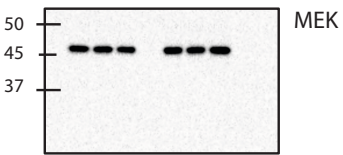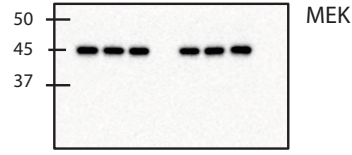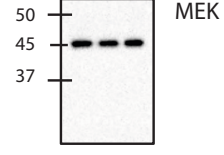

Flag-KSR Expression Input

Flag-BRAF Expression Input

Untransfected Input

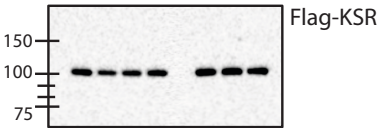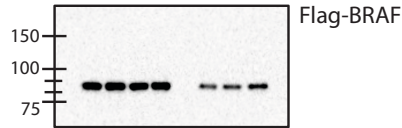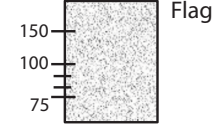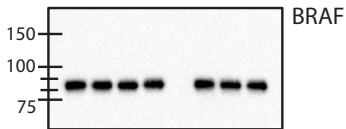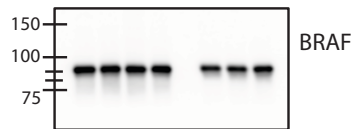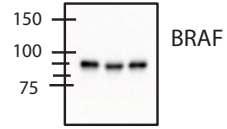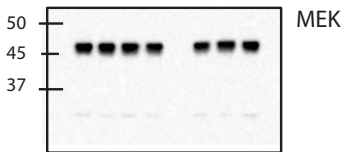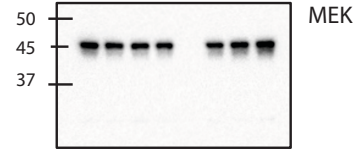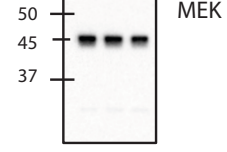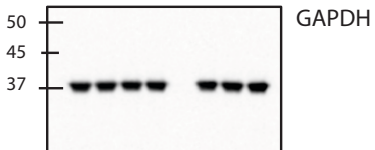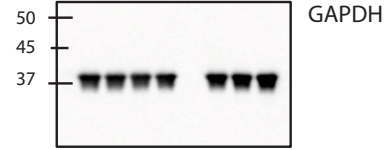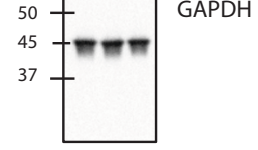

Extended Figure 10A  
Uncropped Blots

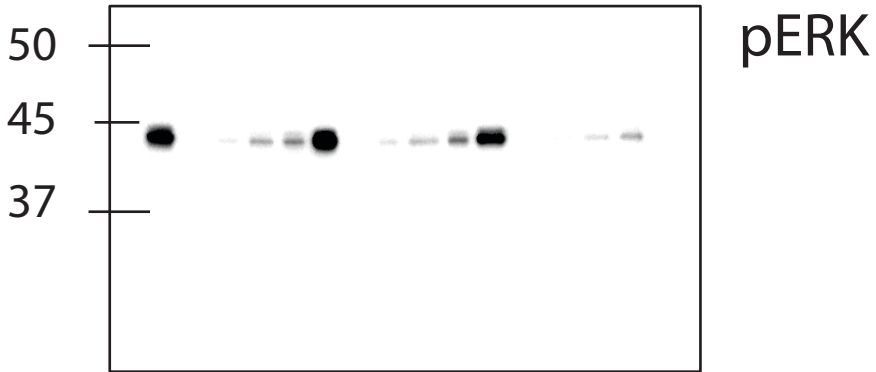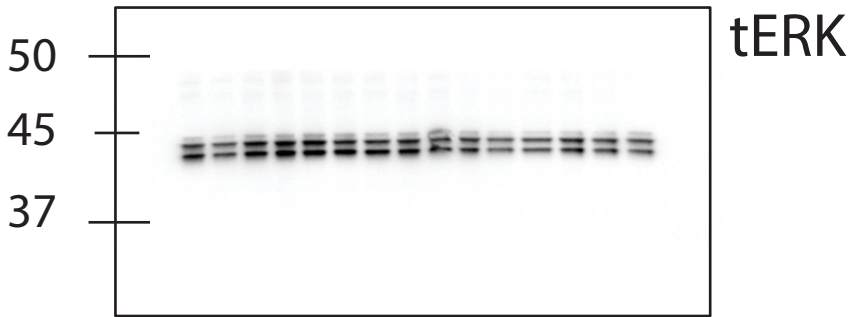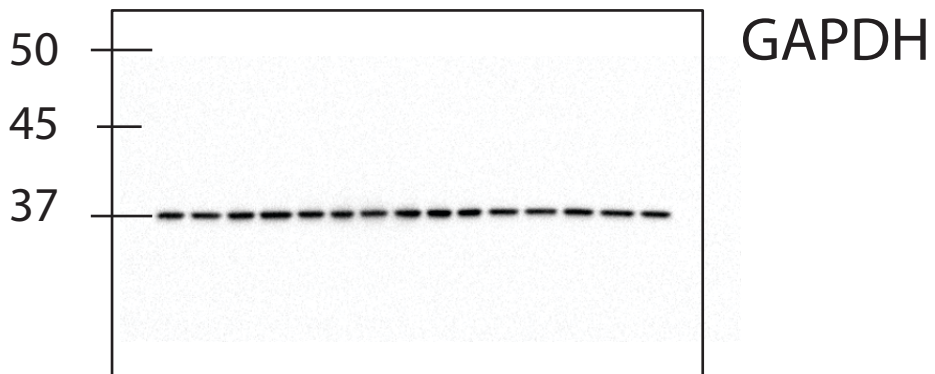

# Extended Data Figure 10F

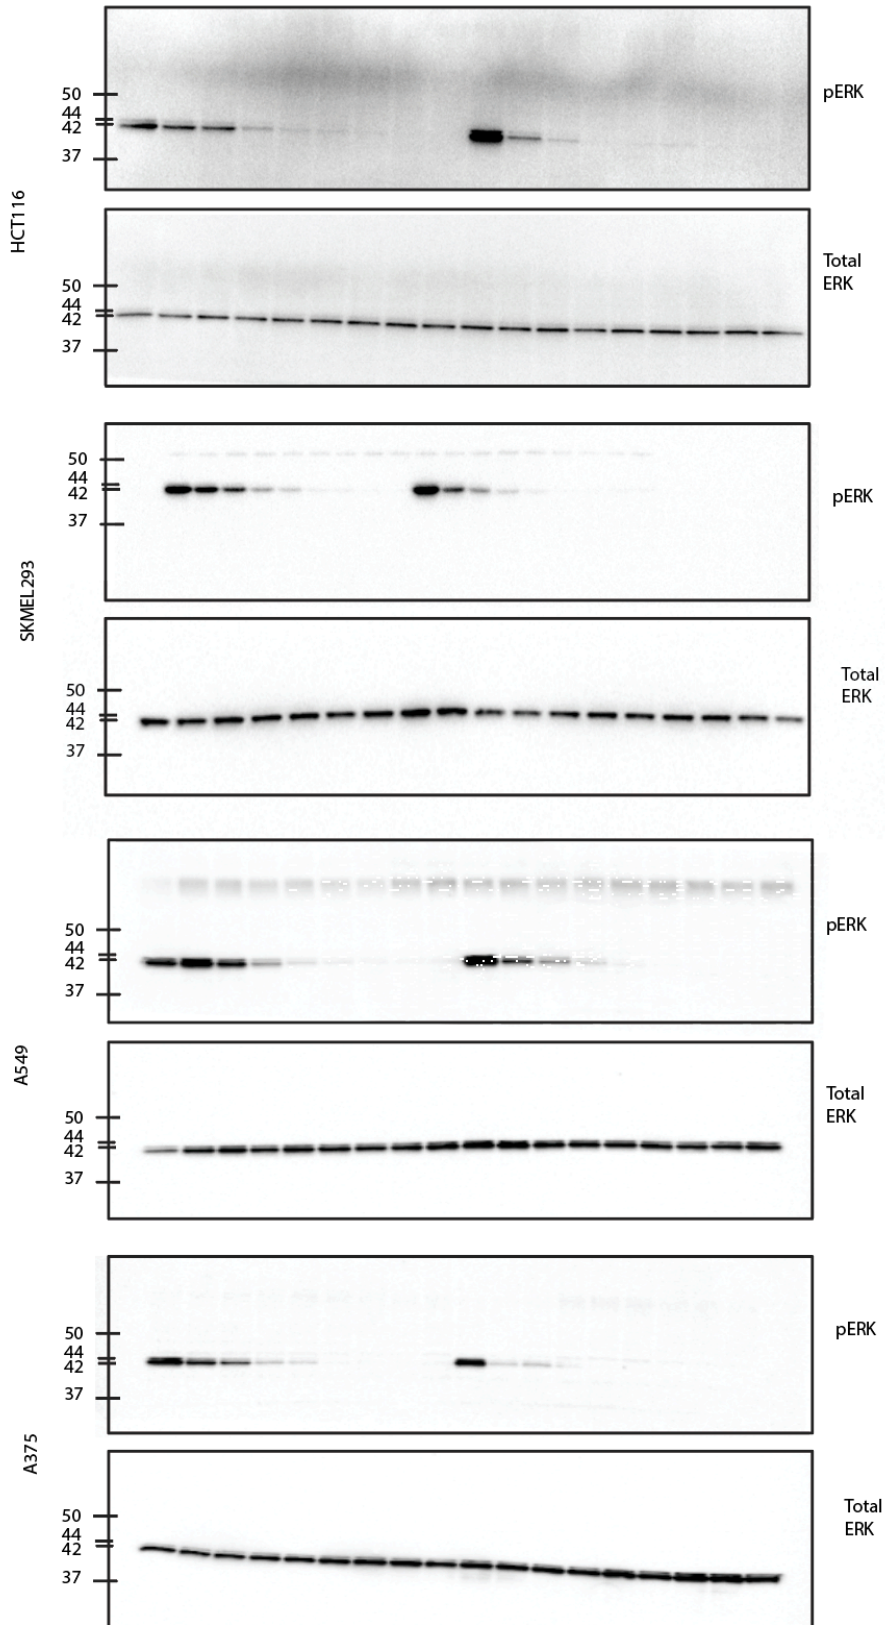

Extended Data Figure 10G

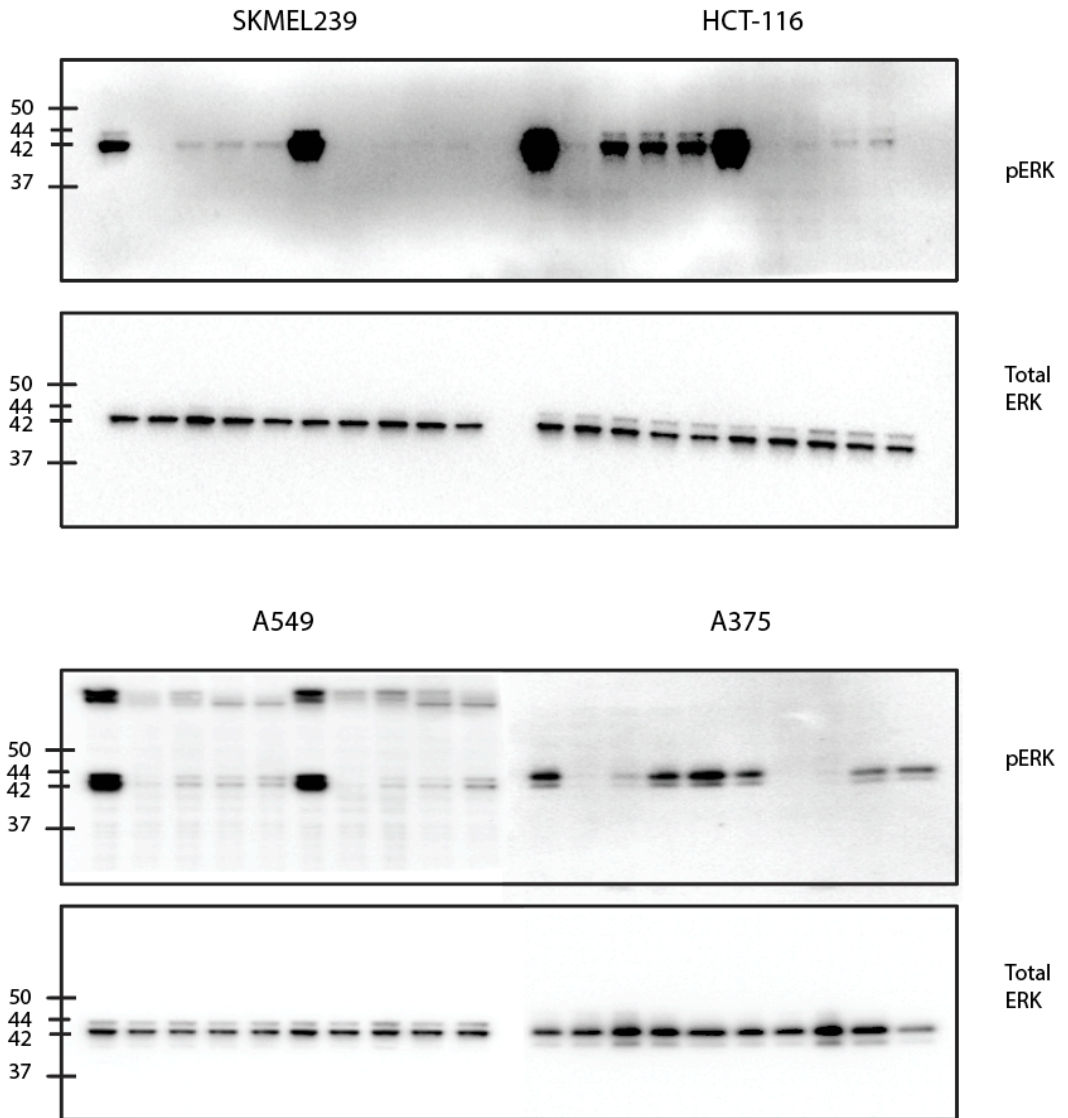

Supplement: NIHMS1626570-supplement-2.pdf [file NIHMS1626570-supplement-2.pdf]
