# Supplementary material
Source: PubMed Central journal article supplement (PMC7746607)

# Table of Contents

|                                                                                                                                                                                                                                                     |     |
|-----------------------------------------------------------------------------------------------------------------------------------------------------------------------------------------------------------------------------------------------------|-----|
| MEK1-luc and KSR1-luc steady-state IC50 replicate curves (Figure 2).....                                                                                                                                                                            | 2   |
| MEK1-luc Washout replicates plotted at different MEKi concentrations (Figure 2).....                                                                                                                                                                | 3   |
| MEK1-luc Washout replicates plotted for each MEKi (Figure 2).....                                                                                                                                                                                   | 4   |
| KSR1-luc Washout replicates plotted at different MEKi concentrations (Figure 2).....                                                                                                                                                                | 5-6 |
| KSR1-luc Washout replicates plotted for each MEKi (Figure 2).....                                                                                                                                                                                   | 7   |
| Washout experiments performed at saturating MEKi for MEK1-luc and KSR1-luc.....                                                                                                                                                                     | 8   |
| RET-luc, Src-luc, and KSR1-W781D-luc Trametinib dose-responses (Extended Data Figure 4).....                                                                                                                                                        | 9   |
| MEK1-luc + KSR1 WT/W781D co-expression steady-state IC50 replicate curves (Extended Data Figure 5).....                                                                                                                                             | 10  |
| Trametinib dose-response on MEK1 co-expressions, Tram-bo wash-in on MEK1 co-expressions, and<br>Tram-bo BRET buildup curves for ARAF-luc, BRAF-luc, CRAF-luc, hKSR1-luc, and hKSR2-luc<br>(Extended Data Figure 5 and Extended Data Figure 7) ..... | 11  |

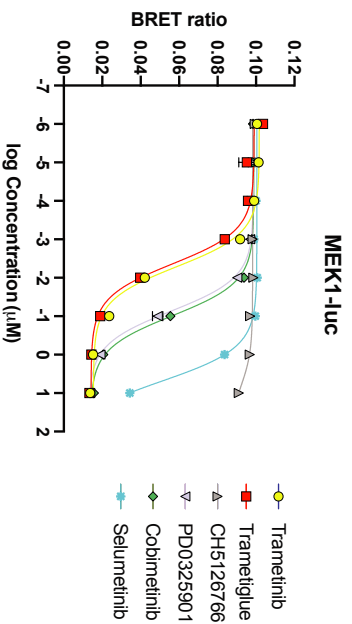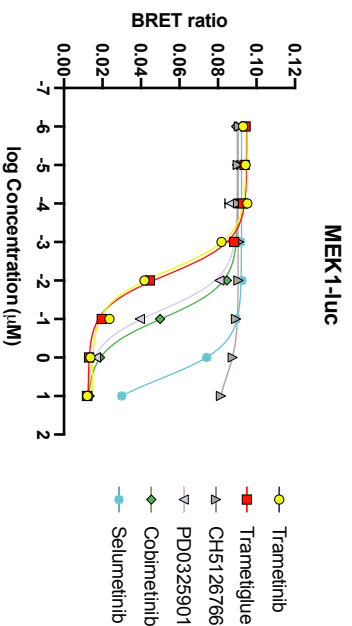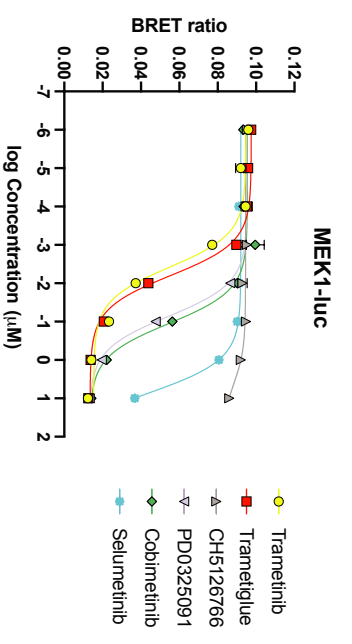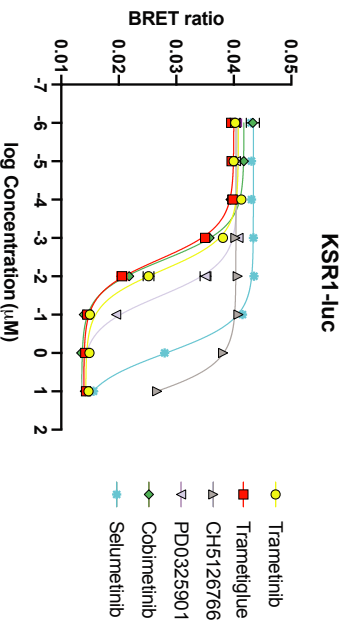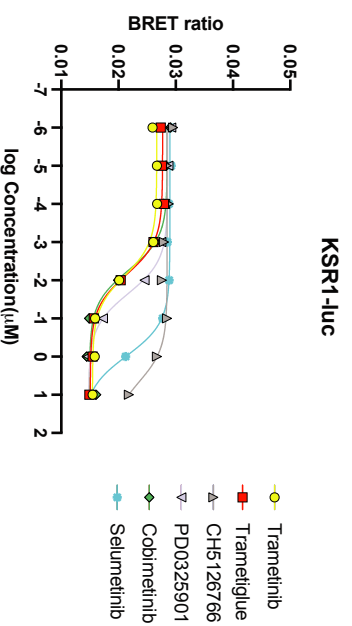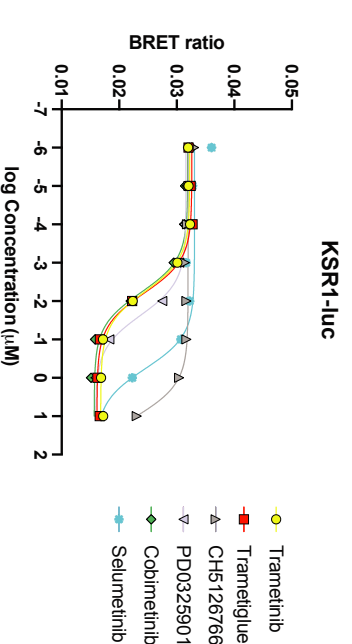

| Trametinib (μM) | Independent replicate 1 |          |          |         | Independent replicate 2 |          |          |         | Independent replicate 3 |          |          |          |          |
|-----------------|-------------------------|----------|----------|---------|-------------------------|----------|----------|---------|-------------------------|----------|----------|----------|----------|
|                 | plate 1                 | plate 2  | plate 3  | plate 4 | plate 1                 | plate 2  | plate 3  | plate 4 | plate 1                 | plate 2  | plate 3  | plate 4  | plate 5  |
| KSR1-luc        | 0.007069                | 0.007545 | 0.005778 | 0.00464 | 0.00771                 | 0.00725  | 0.006874 | 0.01    | 0.005647                | 0.005176 | 0.005979 | 0.004772 | 0.008716 |
| MEK1-luc        | 0.005249                | 0.006208 | 0.006681 | 0.01084 | 0.005434                | 0.005319 | 0.01058  | 0.01844 | 0.003834                | 0.004926 | 0.00738  | 0.00731  | 0.006859 |

| KSR1(μM)       | Ind. Rep   |            |            | Average | S.E.M  |
|----------------|------------|------------|------------|---------|--------|
|                | Ind. Rep 1 | Ind. Rep 2 | Ind. Rep 3 |         |        |
| Trametinigluce | 0.0441     | 0.0463     | 0.0312     | 0.0405  | 0.0047 |
| CH5126766      | 15.5500    | 4.5570     | 10.4500    | 10.1857 | 3.1762 |
| PD0325901      | 0.0337     | 0.0226     | 0.0236     | 0.0266  | 0.0035 |
| Cobimetinib    | 0.0038     | 0.0056     | 0.0060     | 0.0051  | 0.0007 |
| Selumetinib    | 1.0340     | 0.9685     | 0.5851     | 0.8625  | 0.1400 |

| MEK1(μM)       | Ind. Rep   |            |            | Average | S.E.M  |
|----------------|------------|------------|------------|---------|--------|
|                | Ind. Rep 1 | Ind. Rep 2 | Ind. Rep 3 |         |        |
| Trametinigluce | 0.0352     | 0.0296     | 0.0300     | 0.0316  | 0.0018 |
| CH5126766      | 6.1620     | 2.8820     | 3.8050     | 4.2830  | 0.9766 |
| PD0325901      | 0.0748     | 0.0588     | 0.0746     | 0.0694  | 0.0053 |
| Cobimetinib    | 0.0987     | 0.0961     | 0.1137     | 0.1028  | 0.0055 |
| Selumetinib    | 4.9150     | 3.6600     | 7.3450     | 5.3067  | 1.0816 |

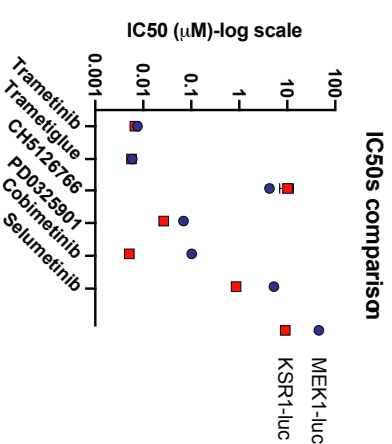

Plotted data and error bars represent the mean and SEM of three technical replicates except for Trametinib, which is four technical replicates

# Washout on MEK1-luc reporter

Cells were pre-treated with the indicated concentration for each MEKi, washed with Opti-MEM, and BRET signal was measured for 175 min upon the addition of Tram-bo and the Nanoluc substrate furimazine. Related to Figure 2. Each independent replicate was conducted in technical duplicates.

## Independent Replicate 1

## Independent Replicate 2

## Independent Replicate 3

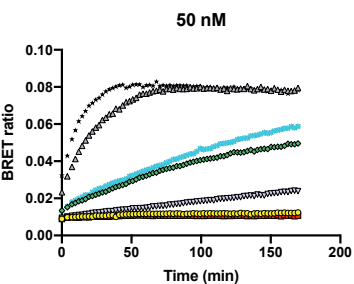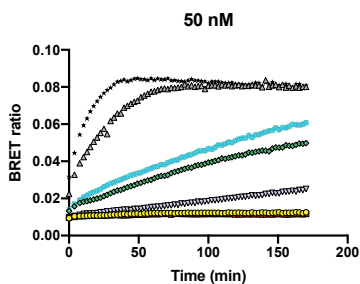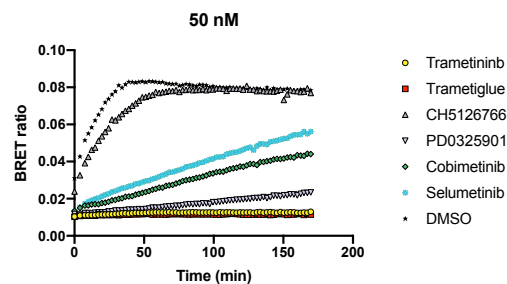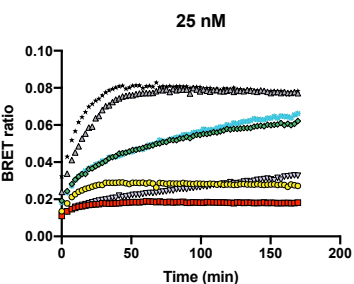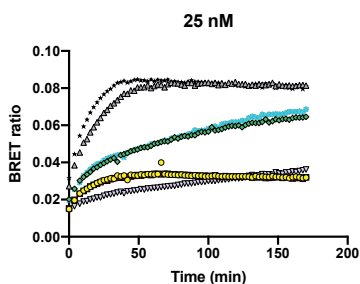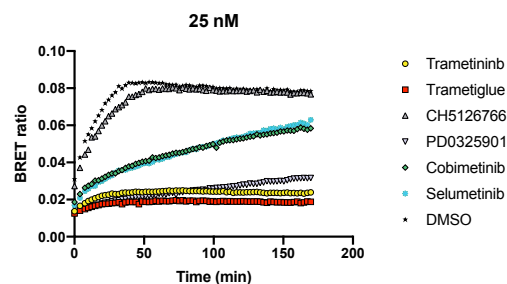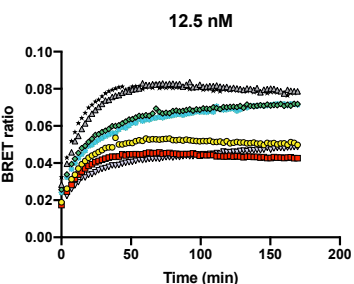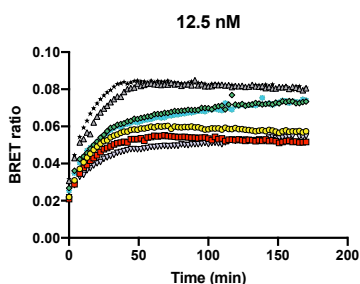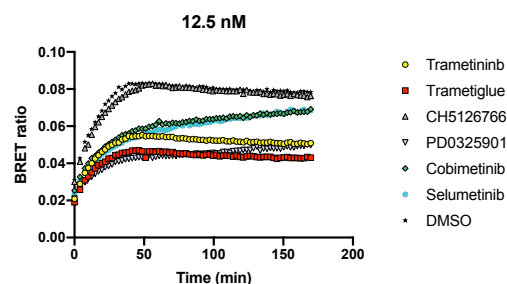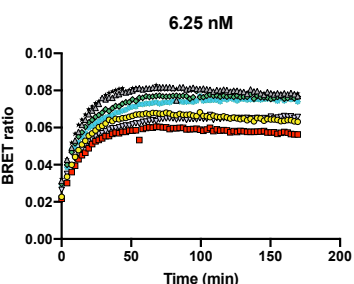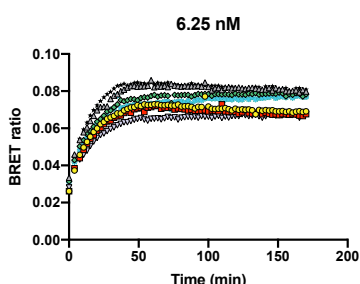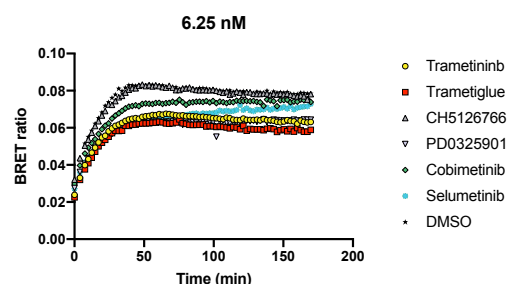

# Washout on MEK1-luc reporter: data replotted from page 3 as a function of concentration

### Independent Replicate 1

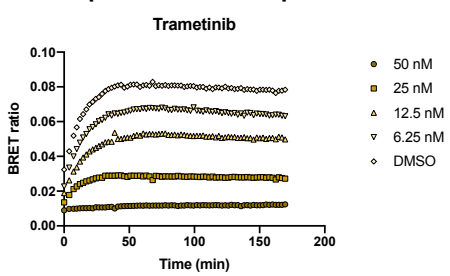

### Independent Replicate 2

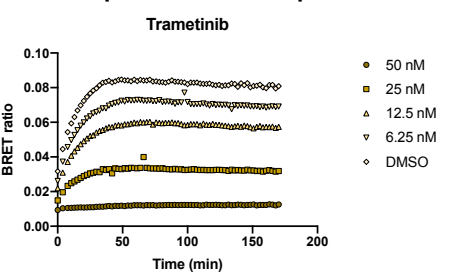

### Independent Replicate 3

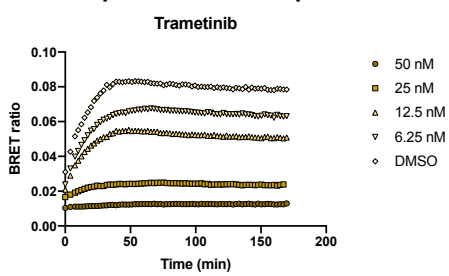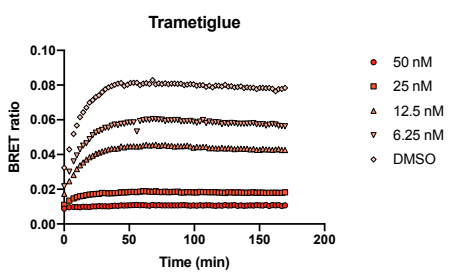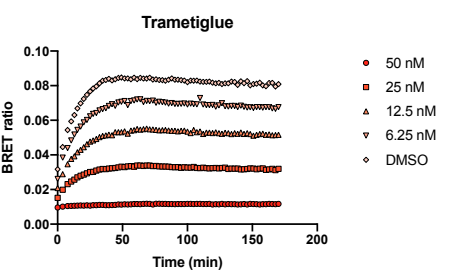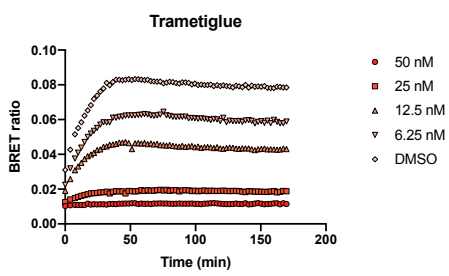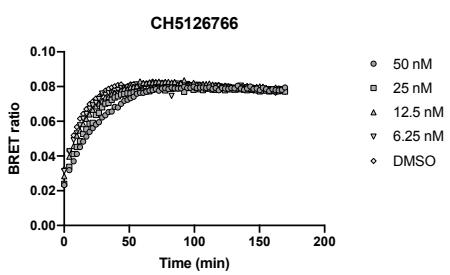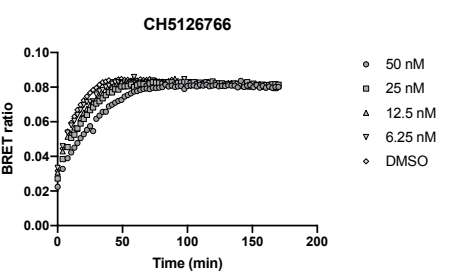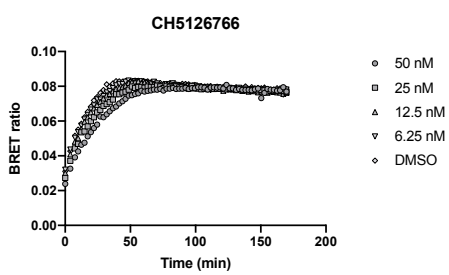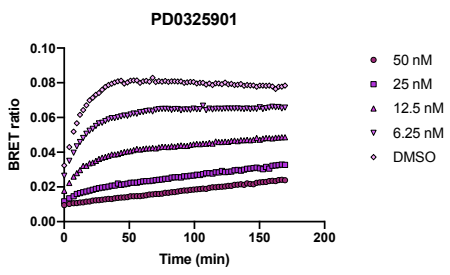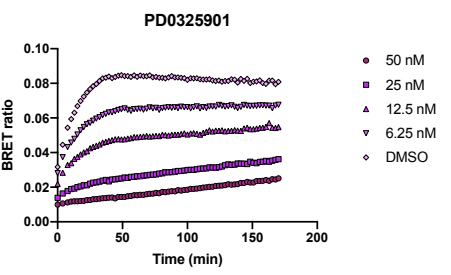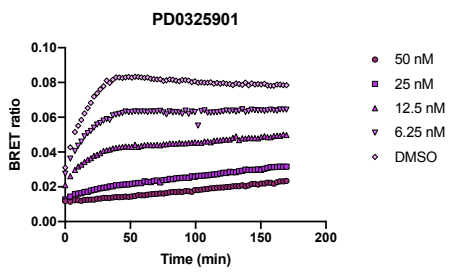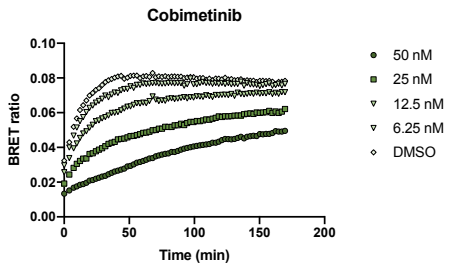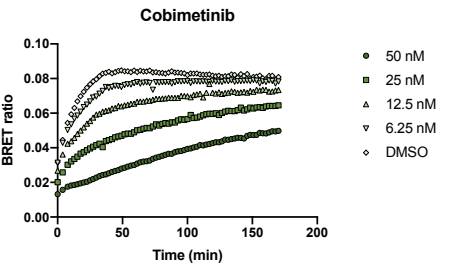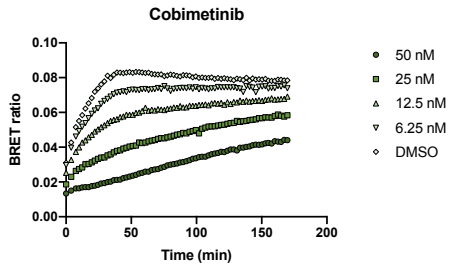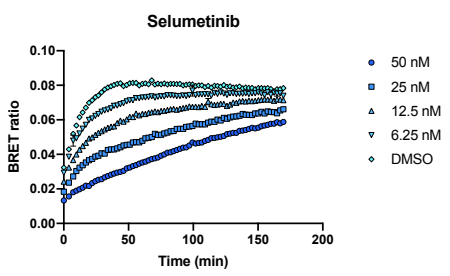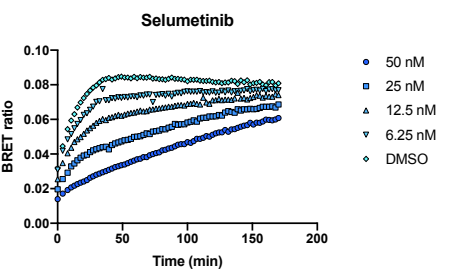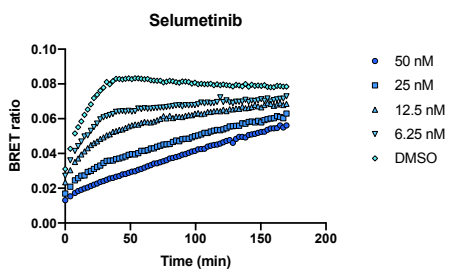

# Washout on KSR1-luc reporter

Cells were pre-treated with the indicated concentration for each MEKi, washed with Opti-MEM, and BRET signal was measured for 175 min upon the addition of Tram-bo and the Nanoluc substrate furimazine. Related to Figure 2. Each replicate was conducted in technical duplicates.

## Independent Replicate 1

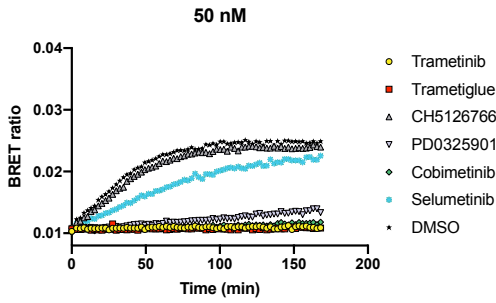

## Independent Replicate 2

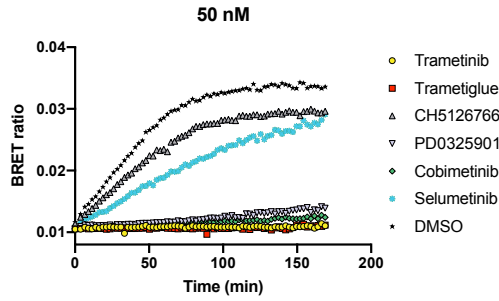

## Independent Replicate 3

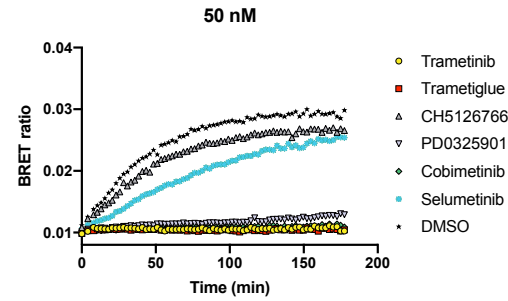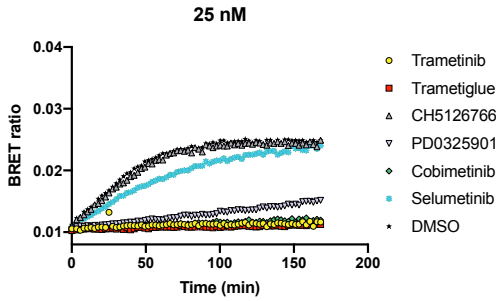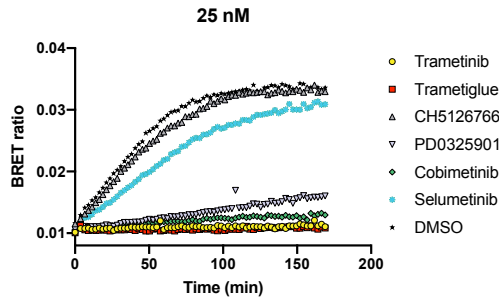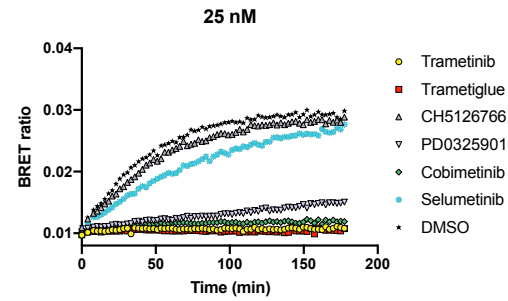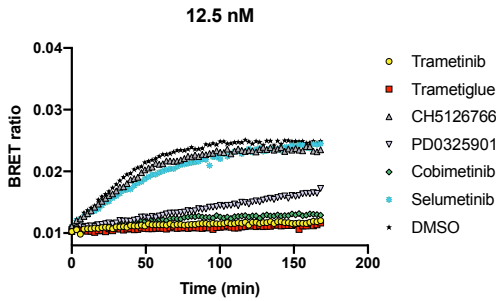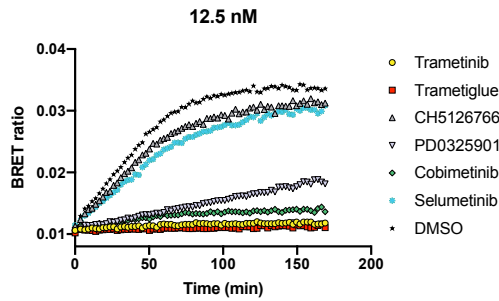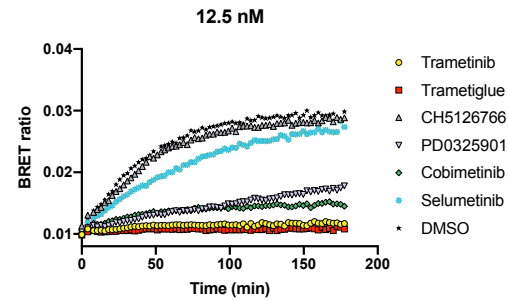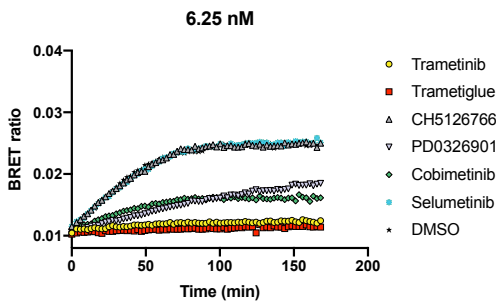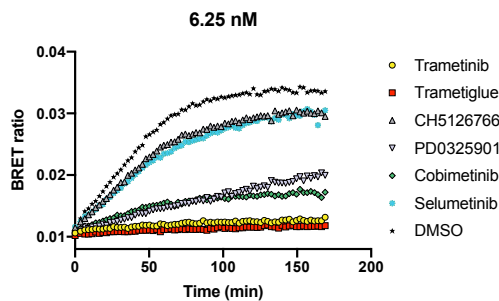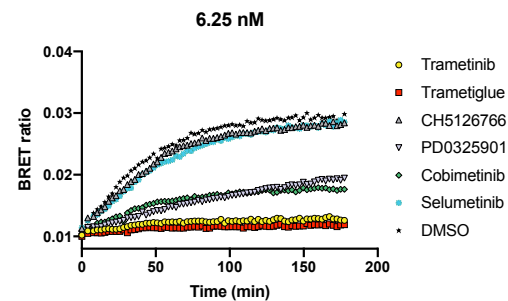

# Washout on KSR1-luc reporter

Cells were pre-treated with the indicated concentration for each MEKi, washed with Opti-MEM, and BRET signal was measured for 175 min upon the addition of Tram-bo and the Nanoluc substrate furimazine. Related to Figure 2. Each replicate was conducted in technical duplicates.

## Independent Replicate 1

## Independent Replicate 2

## Independent Replicate 3

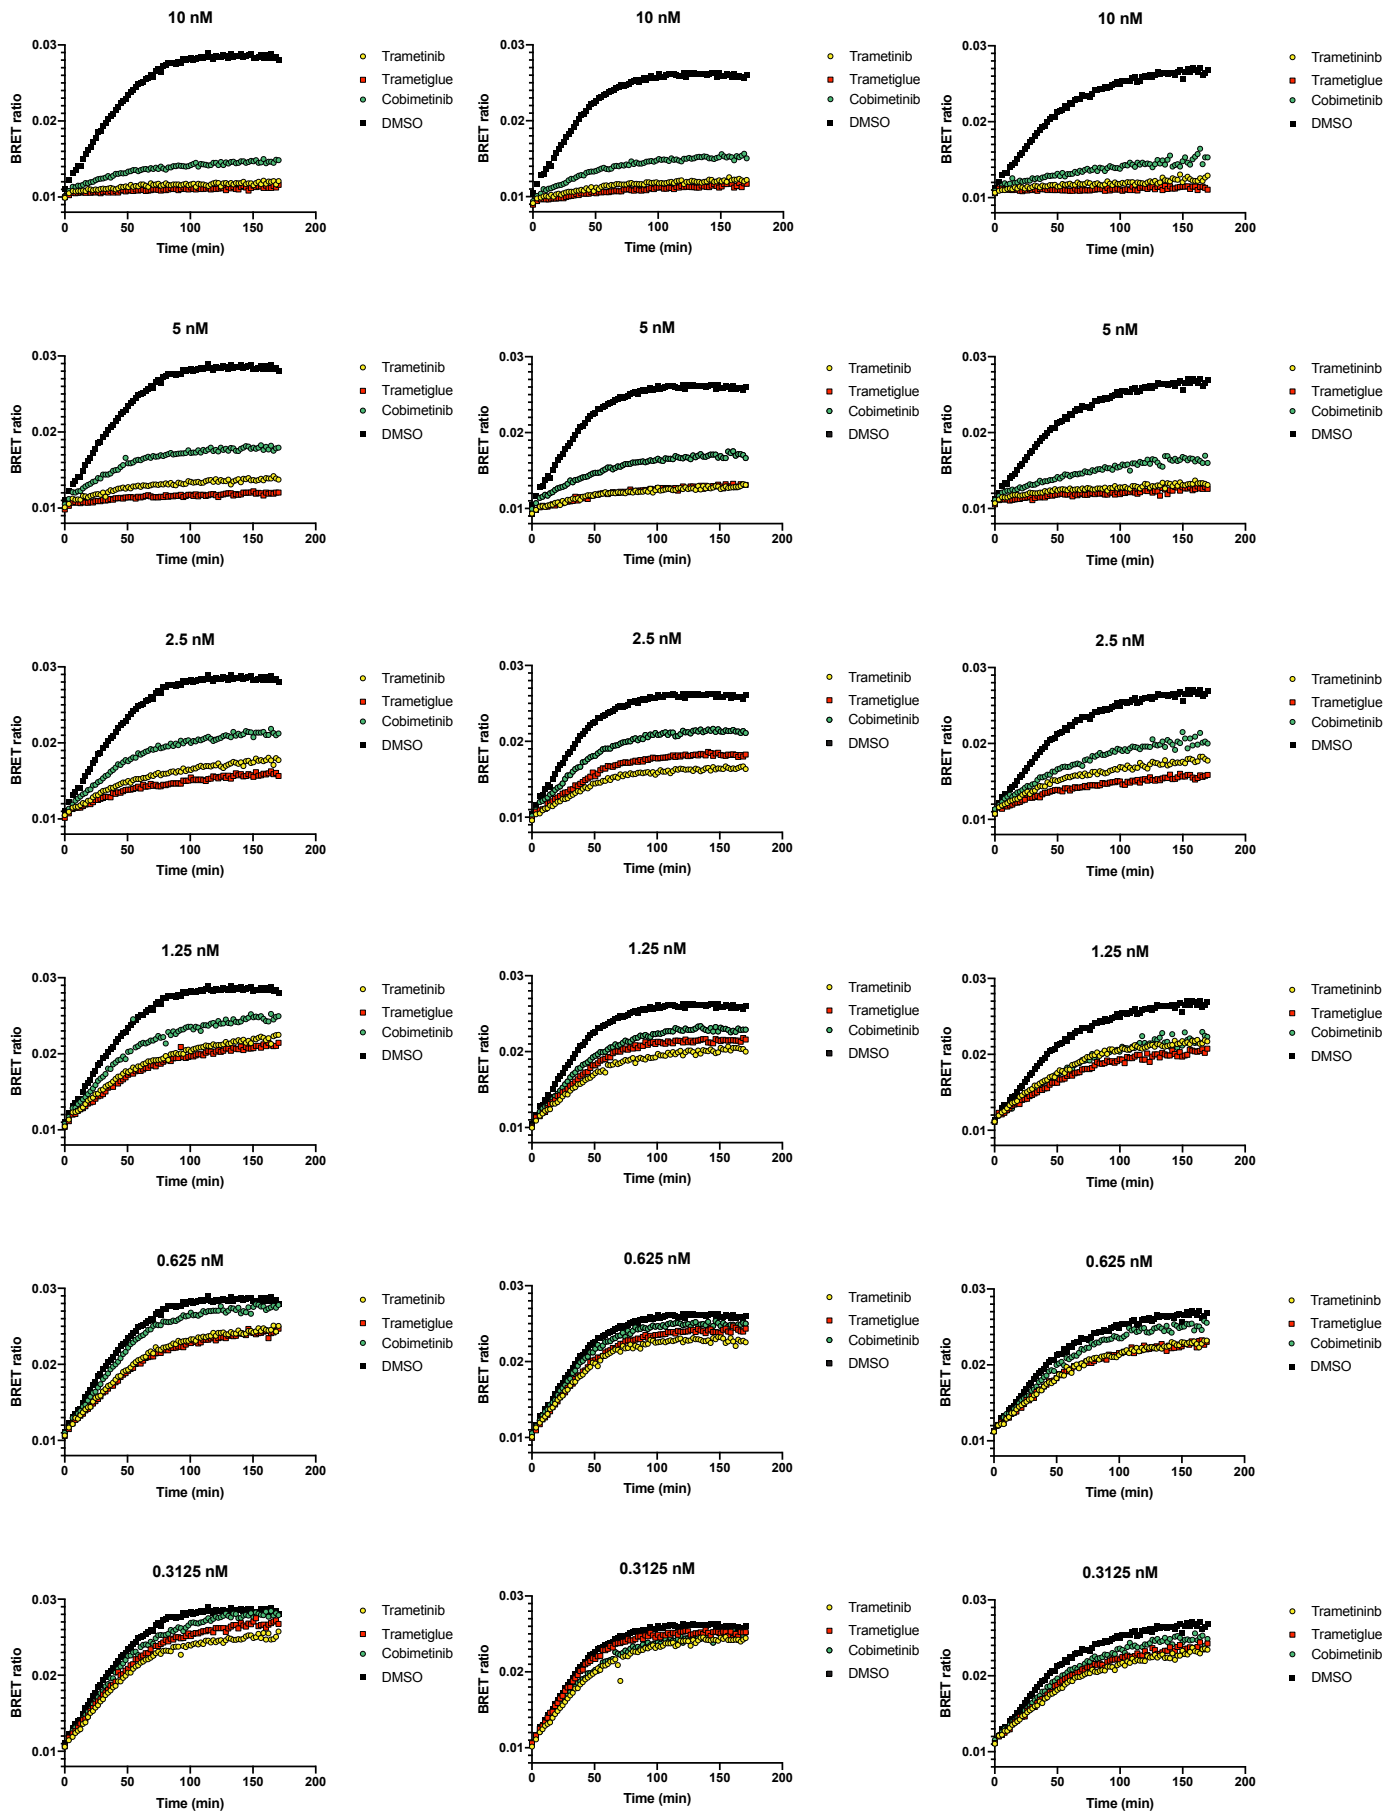

# Washout on KSR1-luc reporter: data replotted from page 5 as a function of concentration

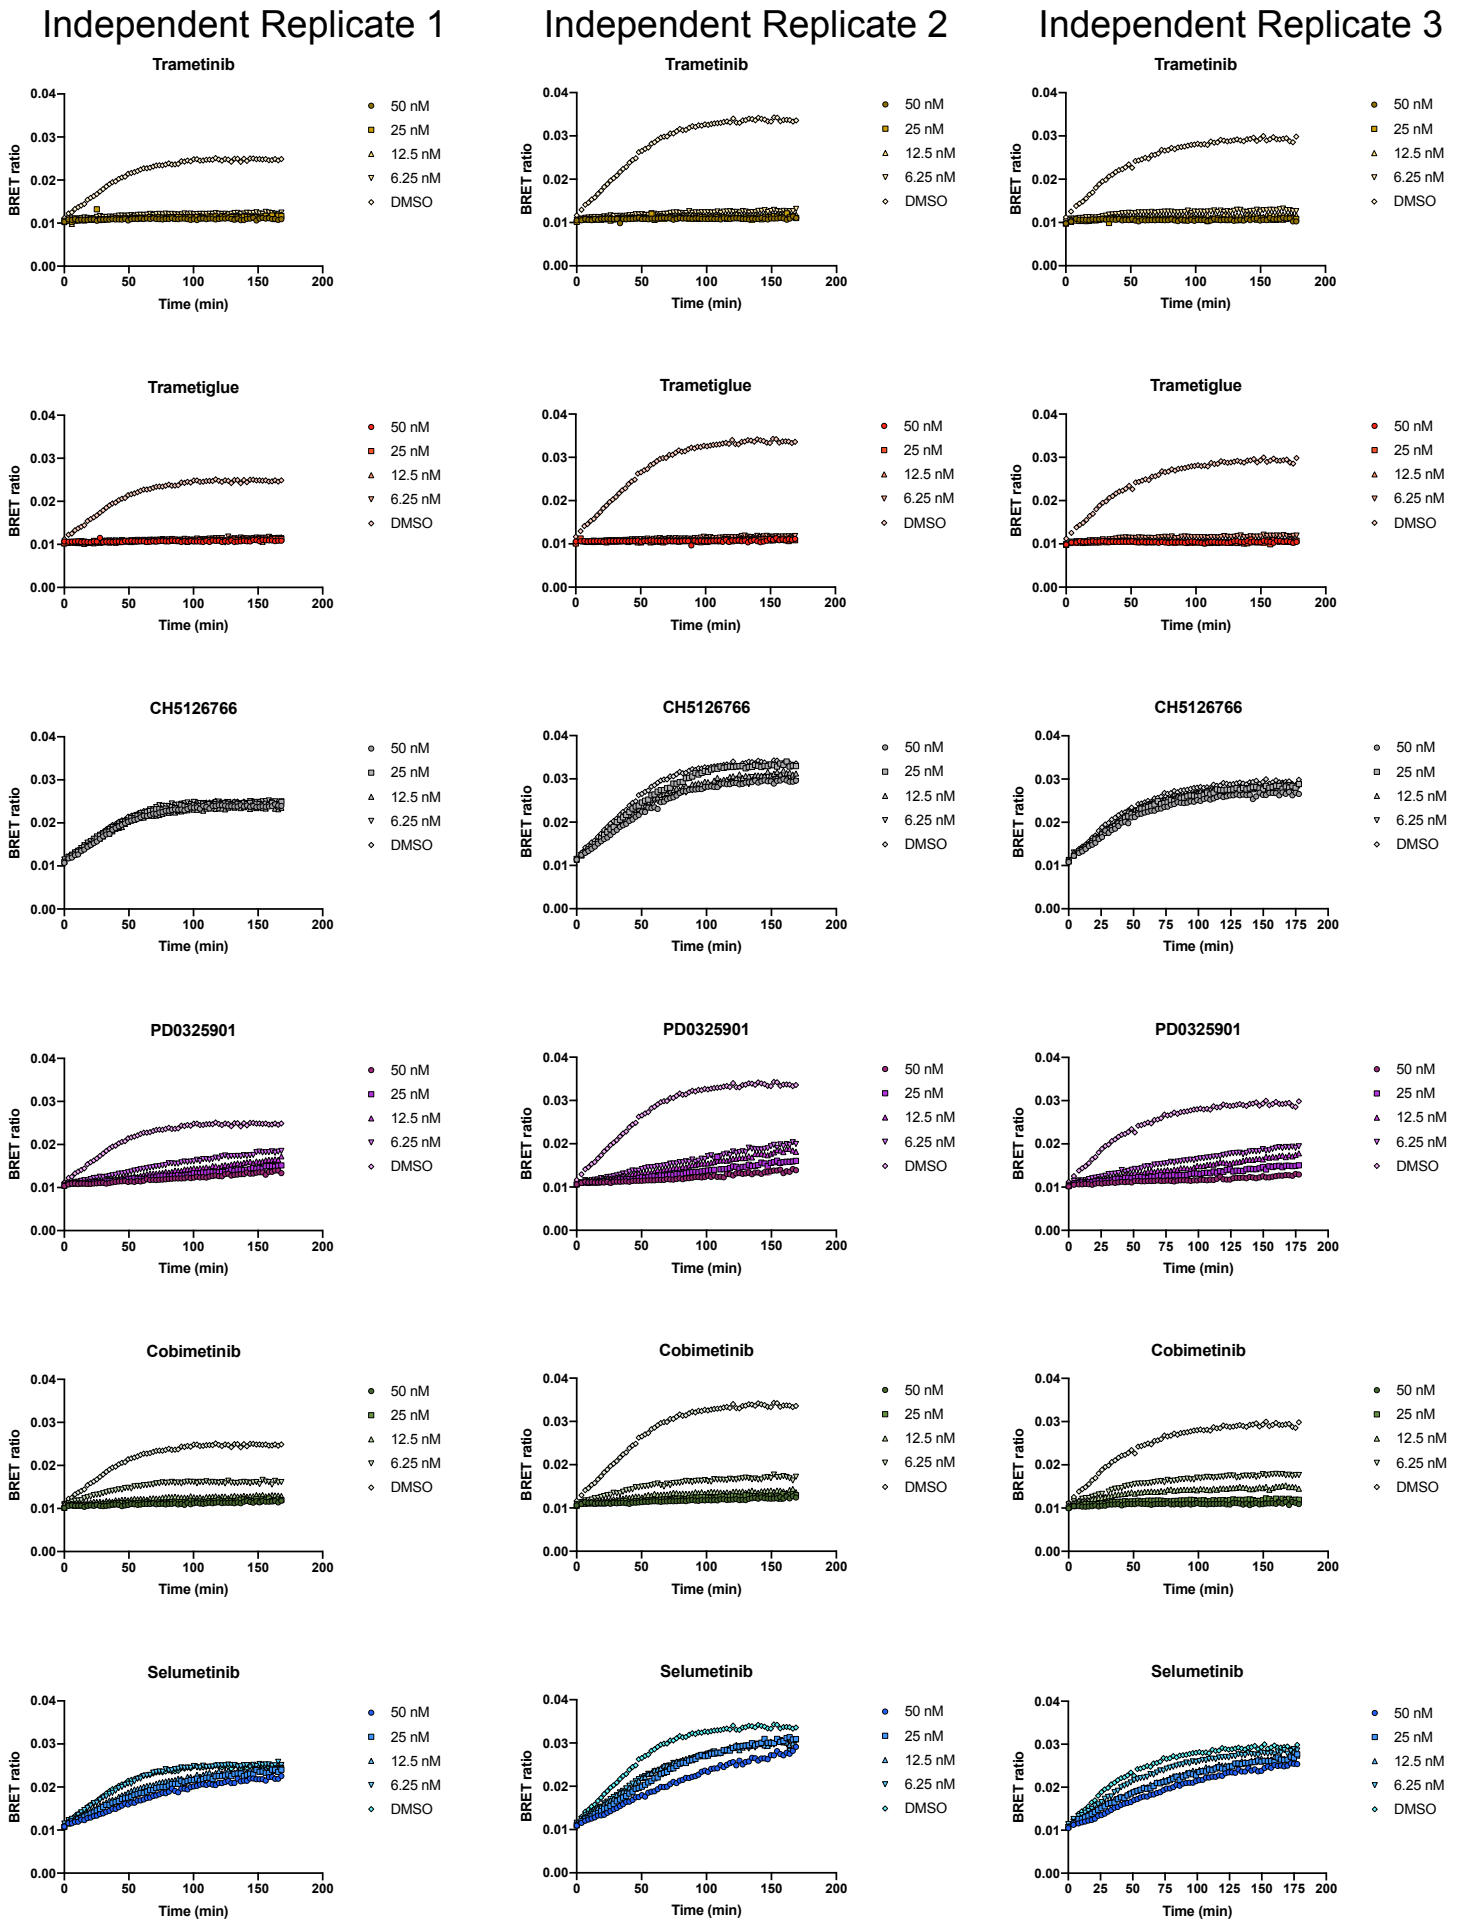

## MEK1-luc

wash

Independent Replicate 1

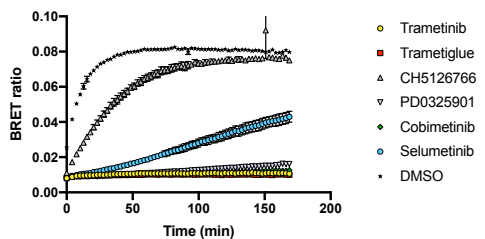

Independent Replicate 2

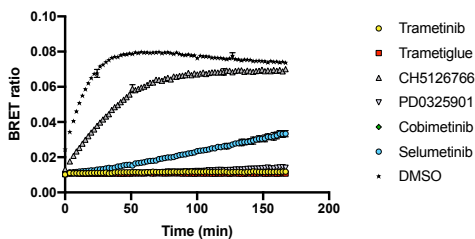

Independent Replicate 3

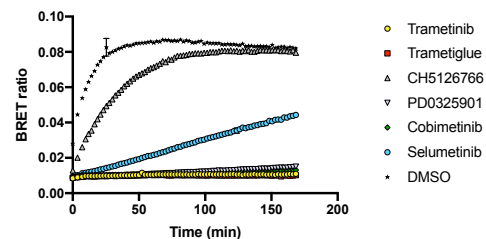

no-wash

Independent Replicate 1

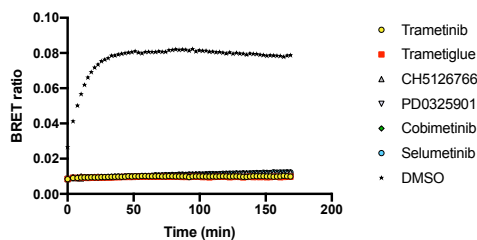

Independent Replicate 2

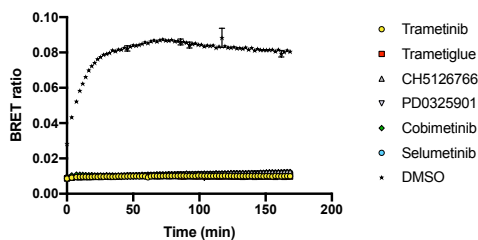

Independent Replicate 3

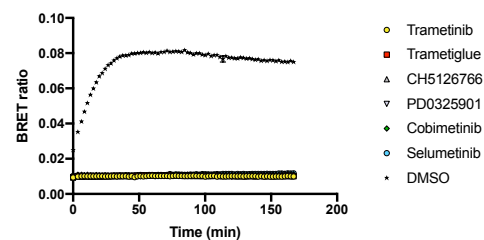

## KSR1-luc

wash

Independent Replicate 1

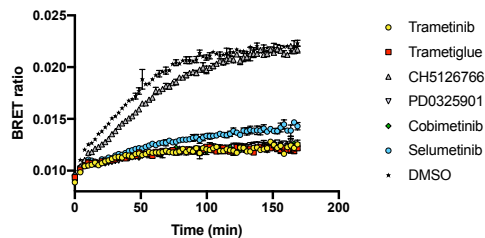

Independent Replicate 2

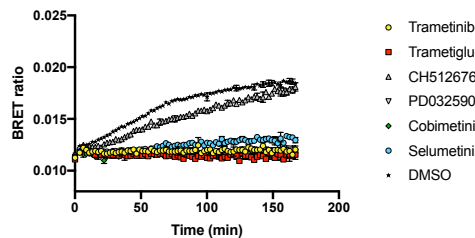

Independent Replicate 3

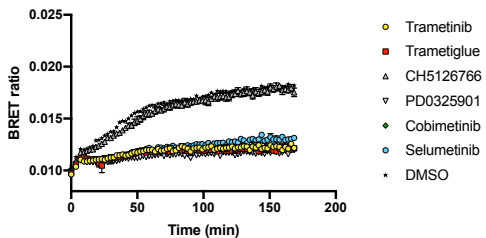

no-wash

Independent Replicate 1

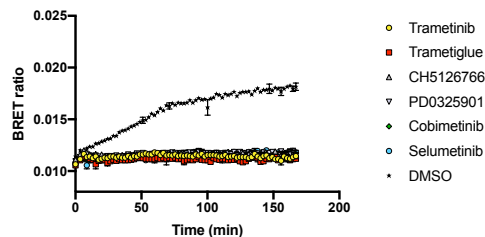

Independent Replicate 2

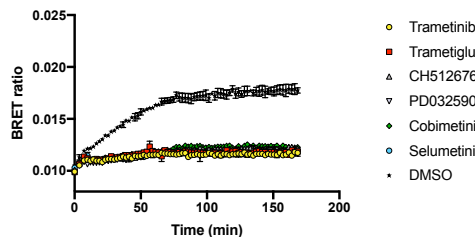

Independent Replicate 3

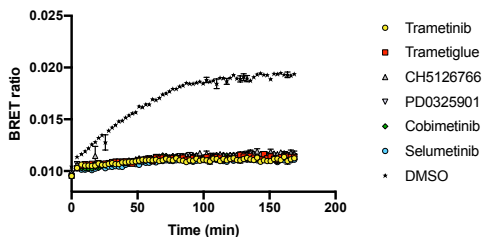

Comparison of tram-bo wash-in buildup curves on cells pre-treated at 15x the IC50 for each MEKi. Cells were either washed with Opti-MEM to remove excess drug (wash) or directly assayed (no-wash) upon the addition of tram-bo and the Nano-luc substrate furimazine. Data and error bars represent the mean and SEM of technical triplicates. The lack of build-up signal under no-wash conditions demonstrates that MEK1-luc and KSR1-luc were completely saturated with each MEKi. However, given the potency of several MEKi (i.e. no build-up over 175 min), lower concentrations of those MEKi were used to distinguish variances in MEKi off-rates or residence time (pages 2 and 4).

| Drug         | Saturating Concentration |
|--------------|--------------------------|
| Trametinib   | 100 nM                   |
| Trametigluce | 100 nM                   |
| CH5126766    | 100 $\mu$ M              |
| PD0325901    | 1 $\mu$ M                |
| Cobimetinib  | 2 $\mu$ M                |
| Selumetinib  | 10 $\mu$ M               |



## RET-luc + Tram-bo (1 $\mu$ M)

### Independent Replicate 1

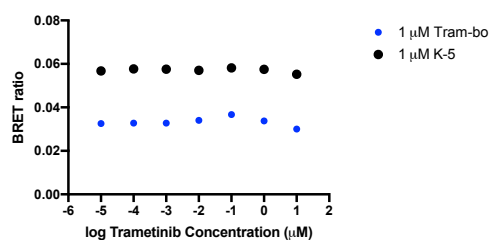

### Independent Replicate 2

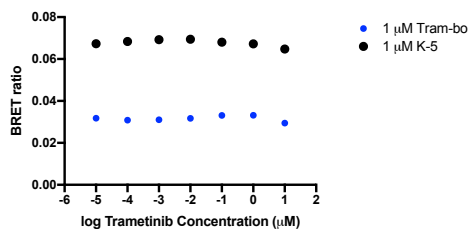

### Independent Replicate 3

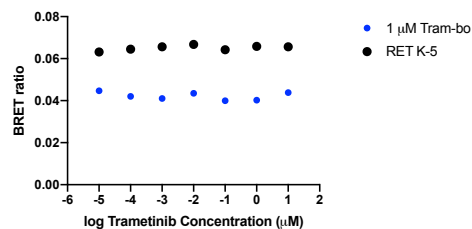

## Src-luc + Tram-bo (1 $\mu$ M)

### Independent Replicate 1

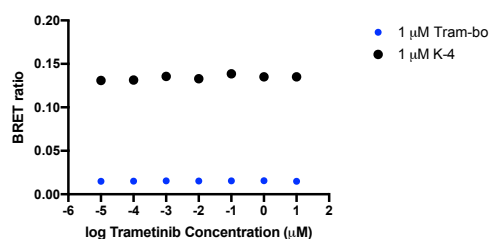

### Independent Replicate 2

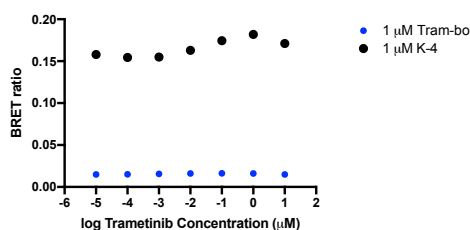

### Independent Replicate 3

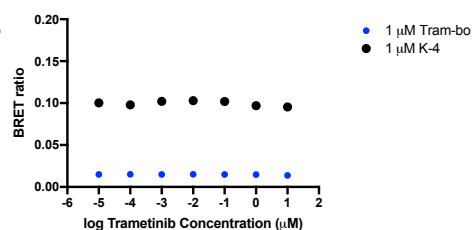

The lack of dose-responses of control kinases (RET and SRC-luc) reveal that tram-bo specifically generates BRET dose on MEK1-luc and KSR1-luc. Related to Extended Data Figure 4. Data represent the average of duplicate technical replicates.

## KSR1-luc W781D + Tram-bo (1 $\mu$ M)

### Independent Replicate 1

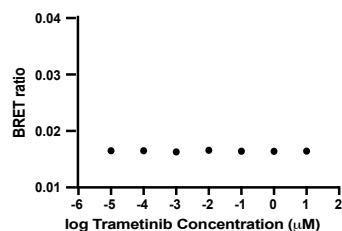

### Independent Replicate 2

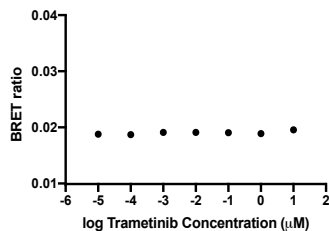

### Independent Replicate 3

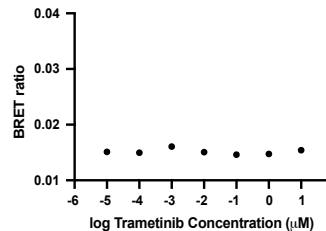

The lack of dose-responses on KSR1-W781D-luc reveals that tram-bo specifically generates BRET dose on on the MEK1-KSR1-complex. Data represent the average of duplicate technical replicates.

MEK1-luc + KSR1-WT

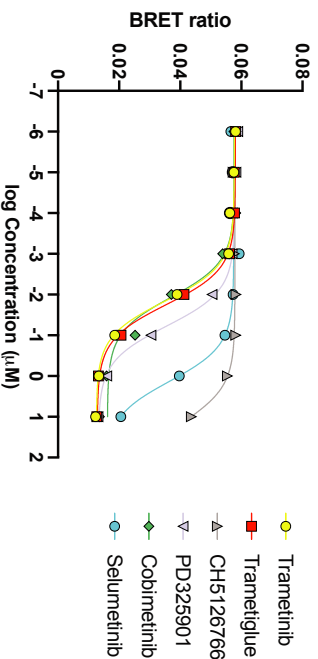

MEK1-luc + KSR1-WT

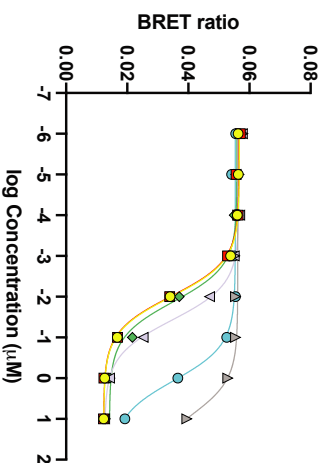

MEK1-luc + KSR1-WT

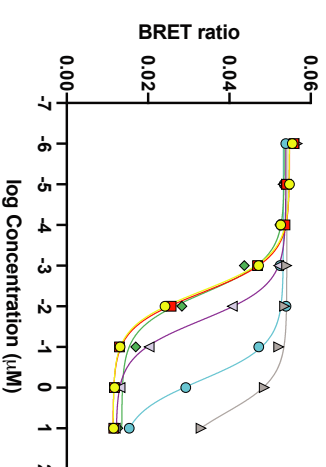

MEK1-luc + KSR1-W781D

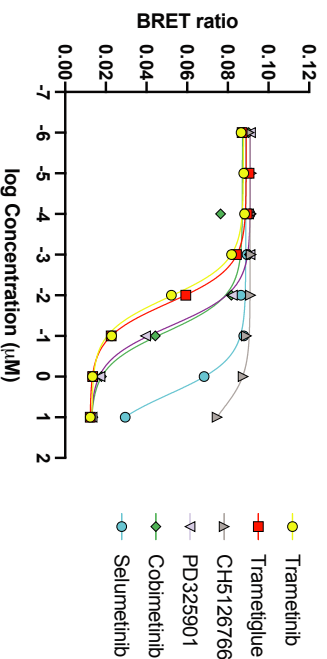

MEK1-luc + KSR1-W781D

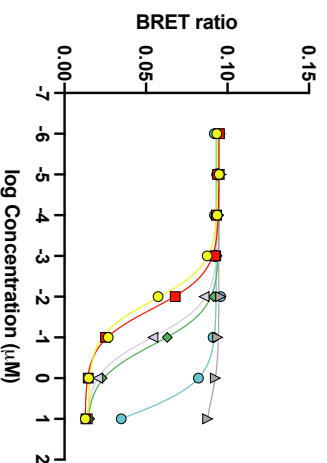

MEK1-luc + KSR1-W781D

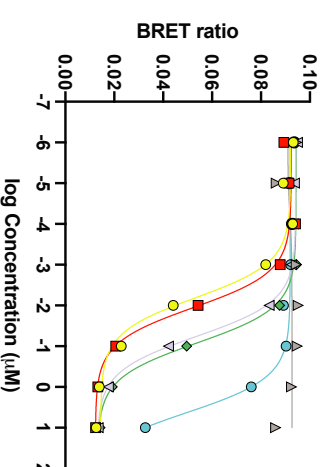

| MEK1-luc + KSR1-WT (μM) | ind. rep. 1 | ind. rep. 2 | ind. rep. 3 | Average    | SEM        |
|-------------------------|-------------|-------------|-------------|------------|------------|
| Trametinib              | 0.00429     | 0.01003     | 0.01455     | 0.00962333 | 0.00296878 |
| Trametigluce            | 0.004731    | 0.009799    | 0.01782     | 0.01078333 | 0.00381039 |
| CH5126766               | 4.167       | 8.029       | 12.25       | 8.14866667 | 2.33412813 |
| PD0325901               | 0.0224      | 0.03817     | 0.06024     | 0.04027    | 0.01097382 |
| Cobimetinib             | 0.004868    | 0.01346     | 0.01183     | 0.01005267 | 0.00263469 |
| Selumetinib             | 0.6553      | 1.162       | 1.357       | 1.0581     | 0.20911889 |

| MEK1-luc + KSR1-W781D (μM) | ind. rep. 1 | ind. rep. 2 | ind. rep. 3 | Average    | SEM        |
|----------------------------|-------------|-------------|-------------|------------|------------|
| Trametinib                 | 0.01149     | 0.01246     | 0.006539    | 0.010163   | 0.00183351 |
| Trametigluce               | 0.01574     | 0.02021     | 0.0114      | 0.01578333 | 0.00254332 |
| CH5126766                  | 6.207       | 3.123       | N/A         | 4.665      | 1.25903773 |
| PD0325901                  | 0.05739     | 0.1017      | 0.05819     | 0.07242667 | 0.01463849 |
| Cobimetinib                | 0.07962     | 0.1551      | 0.08446     | 0.10639333 | 0.02439338 |
| Selumetinib                | 2.738       | 9.274       | 4.336       | 5.44933333 | 1.96718558 |

Plotted data represent the mean of duplicate technical replicates

Comparison of Trametinib dose-response curves on different MEK1 co-expressions (Related to Extended Data Figure 5). Data and error bars represent the mean duplicate technical replicates.

Independent Replicate 1

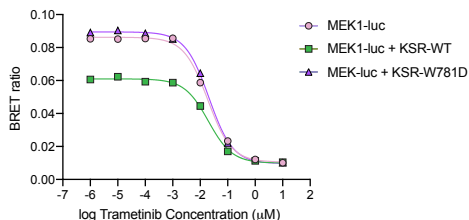

Independent Replicate 2

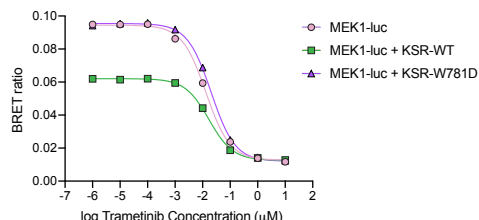

Independent Replicate 3

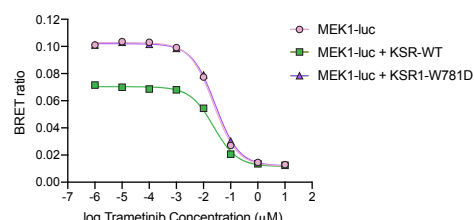

Comparison of Tram-bo wash-in buildup curves on different MEK1 co-expressions (Related to Extended Data Figure 5) Data and error bars represent the mean and SEM of three technical replicates.

Independent Replicate 1

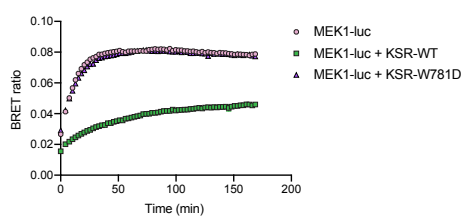

Independent Replicate 2

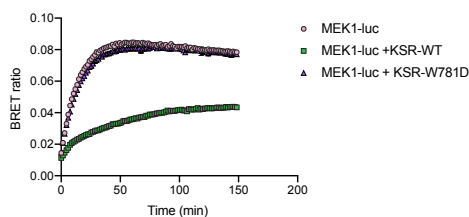

Independent Replicate 3

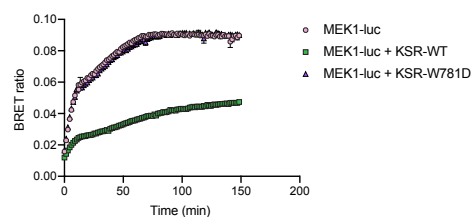

Tram-bo Buildup Curves for ARAF-luc, BRAF-luc, CRAF-luc, hKSR1-luc, and hKSR2-luc (Related to Extended Data Figure 5) Data represent the mean of duplicate technical replicates.

Independent Replicate 1

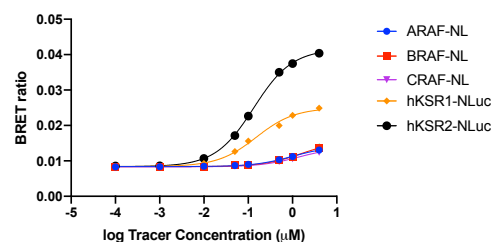

Independent Replicate 2

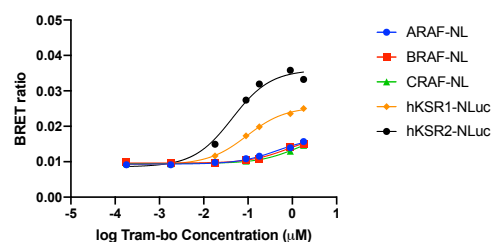

Independent Replicate 3

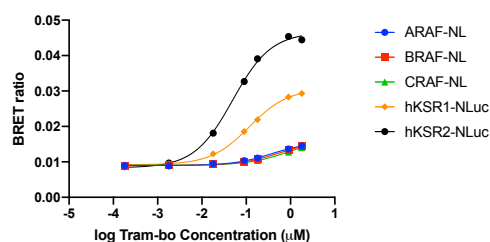

Supplement: NIHMS1626570-supplement-3.pdf [file NIHMS1626570-supplement-3.pdf]
