# Supplementary material
Source: PubMed Central journal article supplement (PMC7746607)
Supplement: NIHMS1626570-supplement-5.pdf [file NIHMS1626570-supplement-5.pdf]

Supplementary Data Table 1: X-ray Crystal Structure Data collection and Refinement Statistics (molecular replacement)

| Data name                                               | KSR2:MEK1:ADP            | KSR2:MEK1:ANP:<br>Trametinib | KSR2:MEK1:ANP:<br>Cobimetinib | KSR2:MEK1:ANP:<br>Selumetinib | KSR2:MEK1:ANP:<br>PD0325901 | KSR2:MEK1:ANP:<br>APS-9-95-1 | KSR1:MEK1:ANP             | KSR1:MEK1:ANP:<br>Trametinib | KSR1:MEK1:ANP:<br>Cobimetinib | KSR1:MEK1:ANP:<br>Selumetinib | KSR1:MEK1:ANP:<br>PD0325901 | KSR1:MEK1:ANP:<br>APS-9-95-1 |
|---------------------------------------------------------|--------------------------|------------------------------|-------------------------------|-------------------------------|-----------------------------|------------------------------|---------------------------|------------------------------|-------------------------------|-------------------------------|-----------------------------|------------------------------|
| PDB code                                                | 7JUQ                     | 7JUR                         | 7JUS                          | 7JUT                          | 7JUJ                        | 7JUV                         | 7JUW                      | 7JUX                         | 7JUY                          | 7JUZ                          | 7JV0                        | 7JV1                         |
| <b>Data collection</b>                                  |                          |                              |                               |                               |                             |                              |                           |                              |                               |                               |                             |                              |
| Space group                                             | P 6 <sub>1</sub> 2 2     | P 6 <sub>1</sub> 2 2         | P 6 <sub>1</sub> 2 2          | P 6 <sub>1</sub> 2 2          | P 6 <sub>1</sub> 2 2        | P 6 <sub>1</sub> 2 2         | P 6 <sub>1</sub> 2 2      | P 6 <sub>1</sub> 2 2         | P 6 <sub>1</sub> 2 2          | P 6 <sub>1</sub> 2 2          | P 6 <sub>1</sub> 2 2        | P 6 <sub>1</sub> 2 2         |
| Cell dimensions                                         |                          |                              |                               |                               |                             |                              |                           |                              |                               |                               |                             |                              |
| <i>a</i> , <i>b</i> , <i>c</i> (Å)                      | 139.03,139.03,<br>222.41 | 139.82,139.82,<br>221.58     | 140.04, 140.04,<br>220.60     | 139.10, 139.10,<br>218.98     | 138.95, 138.95,<br>222.10   | 138.74, 138.74,<br>221.83    | 137.71, 137.71,<br>218.91 | 137.47, 137.47,<br>221.80    | 136.20, 136.20,<br>218.57     | 137.37, 137.37,<br>216.55     | 137.66, 137.66,<br>220.89   | 137.05, 137.05,<br>221.28    |
| $\alpha$ , $\beta$ , $\gamma$ (°)                       | 90 90 120                | 90 90 120                    | 90 90 120                     | 90 90 120                     | 90 90 120                   | 90 90 120                    | 90 90 120                 | 90 90 120                    | 90 90 120                     | 90 90 120                     | 90 90 120                   | 90 90 120                    |
| Resolution (Å)                                          | 50 - 3.22                | 50 - 2.82                    | 50 - 2.99                     | 50 - 3.09                     | 50 - 3.19                   | 50 - 3.35                    | 50 - 2.88                 | 50 - 3.34                    | 50 - 3.1                      | 50 - 3.21                     | 50 - 3.63                   | 50 - 3.62                    |
| <i>R</i> <sub>meas</sub> (%)                            | 9.9 (213.1)              | 13.7 (197.1)                 | 8.0 (247.7)                   | 10.2 (224.8)                  | 10.2 (222.1)                | 9.3 (194.1)                  | 10.7 (268.3)              | 9.0 (227.5)                  | 9.3 (221.2)                   | 7.9 (225.4)                   | 12.3 (187.2)                | 8.6 (190.7)                  |
| <i>I</i> / $\sigma$ <i>I</i>                            | 20.86 (1.33)             | 15.87 (1.30)                 | 22.26 (1.18)                  | 20.90 (1.27)                  | 17.70 (1.20)                | 11.90 (1.27)                 | 18.75 (1.02)              | 17.57 (1.24)                 | 20.4 (1.17)                   | (20.99) 1.09                  | 15.10 (1.30)                | 16.46 (1.36)                 |
| CC <sub>1/2</sub>                                       | 0.99 (0.51)              | 0.99 (0.52)                  | 1.0 (0.51)                    | 1.0 (0.51)                    | 0.99 (0.48)                 | 0.99 (0.59)                  | 0.99 (0.51)               | 0.99 (0.48)                  | 1.0 (0.51)                    | 1.0 (0.54)                    | 0.99 (0.54)                 | 1.0 (0.49)                   |
| Completeness (%)                                        | 99.9 (100)               | 100 (100)                    | 99.9 (100)                    | 99.9 (99.9)                   | 99.8 (100)                  | 99.7 (100)                   | 99.4 (100)                | 99.9 (100)                   | 99.9 (100)                    | 99.8 (99.9)                   | 99.9 (100)                  | 93.7 (95.3)                  |
| Redundancy                                              | 11.98 (12.37)            | 12.05 (12.42)                | 11.98 (12.43)                 | 11.76 (11.15)                 | 10.95 (11.38)               | 11.02 (11.58)                | 14.83 (15.52)             | 11.66 (12.35)                | 11.95 (12.41)                 | 10.59 (11.01)                 | 11.74 (12.28)               | 12.55 (12.98)                |
| <b>Refinement</b>                                       |                          |                              |                               |                               |                             |                              |                           |                              |                               |                               |                             |                              |
| Resolution (Å)                                          | 3.22                     | 2.82                         | 2.99                          | 3.09                          | 3.19                        | 3.35                         | 2.88                      | 3.34                         | 3.1                           | 3.21                          | 3.63                        | 3.62                         |
| No. reflections                                         | 21247                    | 31247                        | 28127                         | 23585                         | 21548                       | 18480                        | 28300                     | 18630                        | 22406                         | 20359                         | 14589                       | 13697                        |
| <i>R</i> <sub>work</sub> / <i>R</i> <sub>free</sub> (%) | 25.4 / 28.8              | 23.7 / 27.7                  | 24.7 / 26.4                   | 25.6 / 30.0                   | 24.1 / 25.7                 | 23.2 / 24.8                  | 23.6 / 27.8               | 26.4 / 28.3                  | 24.7 / 25.7                   | 25.3 / 27.1                   | 24.5 / 25.9                 | 27.7 / 30.3                  |
| No. atoms                                               |                          |                              |                               |                               |                             |                              |                           |                              |                               |                               |                             |                              |
| Protein                                                 | 4670                     | 4662                         | 4651                          | 4654                          | 4645                        | 4662                         | 4679                      | 4667                         | 4668                          | 4628                          | 4652                        | 4639                         |
| Ligand/Ion                                              | 55                       | 101                          | 94                            | 89                            | 90                          | 103                          | 64                        | 100                          | 94                            | 89                            | 89                          | 102                          |
| Water                                                   | 2                        | 7                            | 11                            | 7                             | 3                           | 12                           | 8                         | 1                            | 1                             | 0                             | 0                           | 0                            |
| <i>B</i> -factors                                       |                          |                              |                               |                               |                             |                              |                           |                              |                               |                               |                             |                              |
| Protein                                                 | 118.88                   | 87.97                        | 110.59                        | 112.14                        | 123.65                      | 107.46                       | 106.34                    | 147.59                       | 117.73                        | 139.16                        | 161.22                      | 164.32                       |
| Ligand/Ion                                              | 108.17                   | 83.89                        | 110.08                        | 110.7                         | 118.76                      | 106.73                       | 104.18                    | 156.83                       | 124.17                        | 146.06                        | 173.31                      | 184.11                       |
| Water                                                   | 78.87                    | 56.69                        | 86.6                          | 71.98                         | 71.06                       | 62.91                        | 84.52                     | 109.46                       | 91.64                         | -                             | -                           | -                            |
| R.m.s. deviations                                       |                          |                              |                               |                               |                             |                              |                           |                              |                               |                               |                             |                              |
| Bond lengths (Å)                                        | 0.004                    | 0.007                        | 0.013                         | 0.003                         | 0.003                       | 0.005                        | 0.01                      | 0.003                        | 0.006                         | 0.004                         | 0.004                       | 0.003                        |
| Bond angles (°)                                         | 0.994                    | 1.085                        | 1.813                         | 0.605                         | 0.574                       | 0.965                        | 1.242                     | 0.86                         | 1.089                         | 0.67                          | 0.882                       | 0.88                         |

\* Values in parentheses are for highest-resolution shell.
